# Supplementary material for: Particulate cytoplasmic structures with high concentration of ubiquitin-proteasome accumulate in myeloid neoplasms
Source: PubMed Central journal article supplement (PMC4473848; doi:10.1186/s13045-015-0169-6), 2015-06-18
Supplement: 13045_2015_169_MOESM1_ESM.pdf [file 13045_2015_169_MOESM1_ESM.pdf]

## ADDITIONAL DOCUMENTATION

Pecci et al., Particulate cytoplasmic structures with high concentration of ubiquitin-proteasome accumulate in myeloid neoplasms

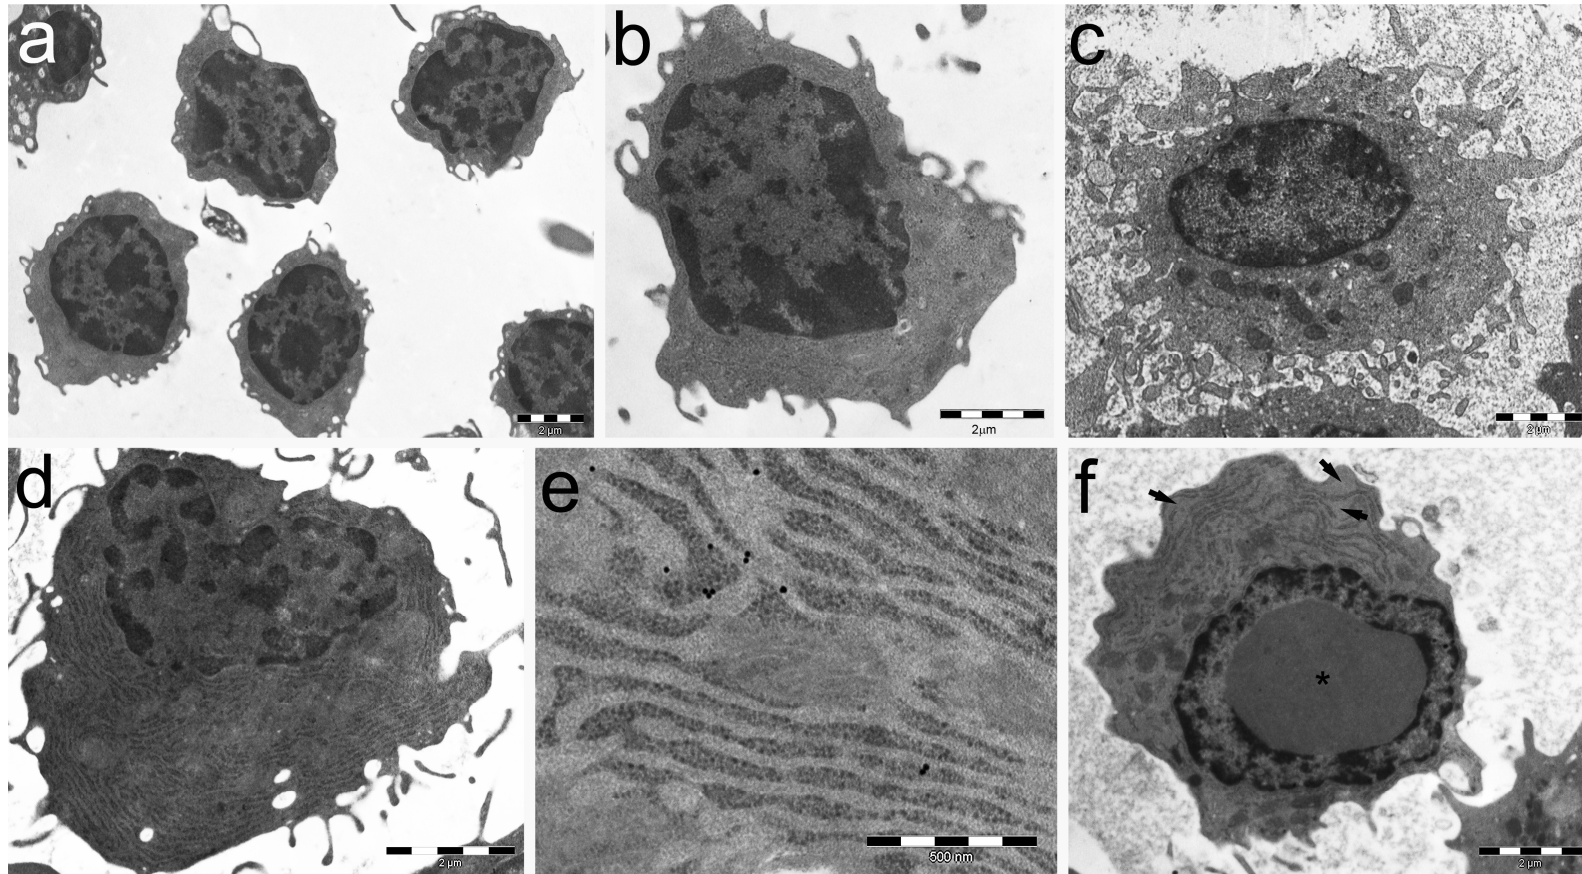

**Additional Figure 1. No PaCSs are found in chronic B cell leukemia and plasma cell myeloma. (a-f):** Representative examples of neoplastic cells in BM samples from patients with chronic lymphocytic leukemia (a, b), hairy cell leukemia (c) or plasma cell myeloma (d-f). In e, the sparse proteasome 20S immunoreactivity in close correlation with extensively developed RER, and in f, the amorphous (immunoglobulin) deposits filling some RER cisternae (arrows), as well as a nuclear invagination (Dutcher body, \*).

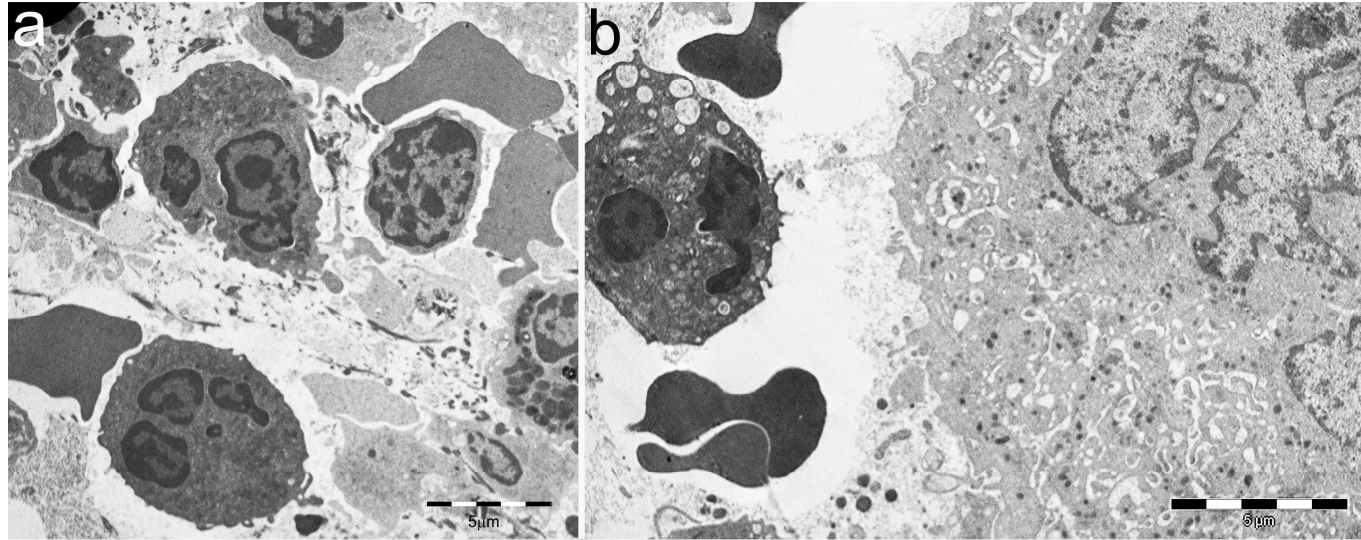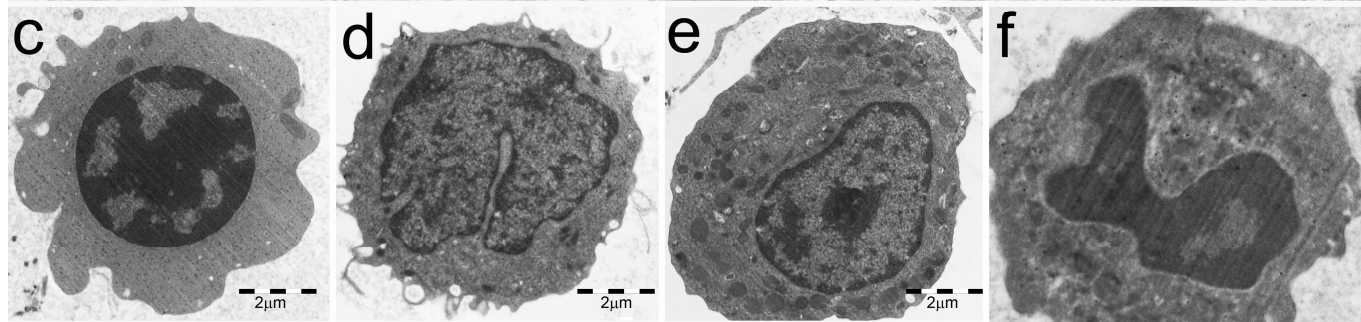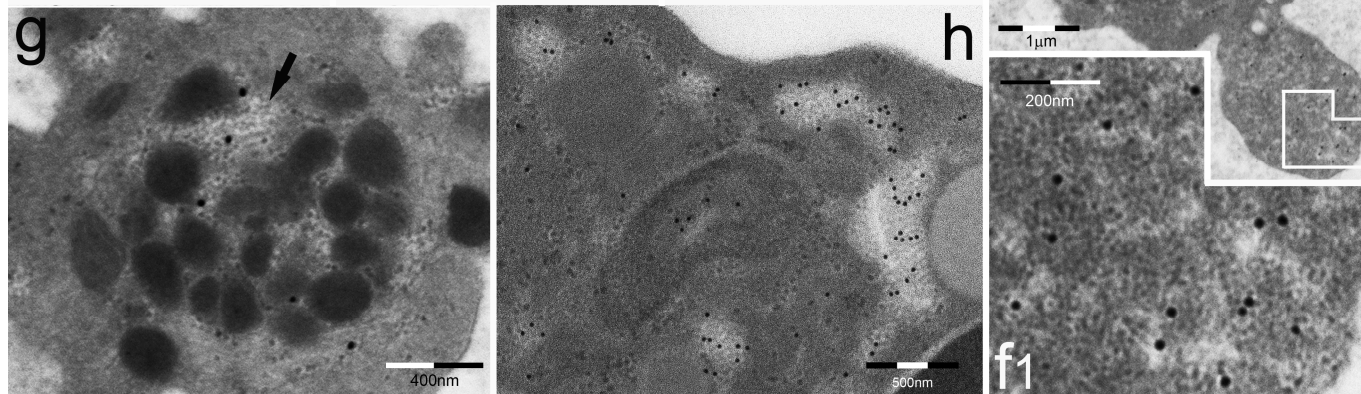

**Additional Figure 2. PaCSs are not found in non-neoplastic BM cells, whereas some PaCSs are identified in PB granulocytes and platelets from healthy subjects. (a-f):** Representative examples of BM cells from healthy individuals, including several granulocytic precursors (a), megakaryocyte, granulocyte and erythrocytes (b), erythroblast (c), monocyte (d), another granulocytic precursor cell (e), and a differentiated neutrophil granulocyte (f). The latter forms an organelle-free cytoplasmic bleb selectively enriched in polyubiquitinated proteins dispersed in the ribosome-rich cytoplasm, often inside minute clear areolae (f1). **(g, h):** PB cells from control subjects with a few FK1-reactive PaCSs are seen in a platelet (g) and a neutrophil granulocyte (h).
